# Supplementary material
Source: publisher figshare collection journal article supplement (https://frontiersin.figshare.com/ndownloader/files/26335357)

**Fig. S2.** Abacus plot of individual tiger shark and Caribbean reef shark detections on acoustic receivers in New Providence Island (BTWNP) and Exuma (BTWGEX), with each receiver station represented by a unique color.


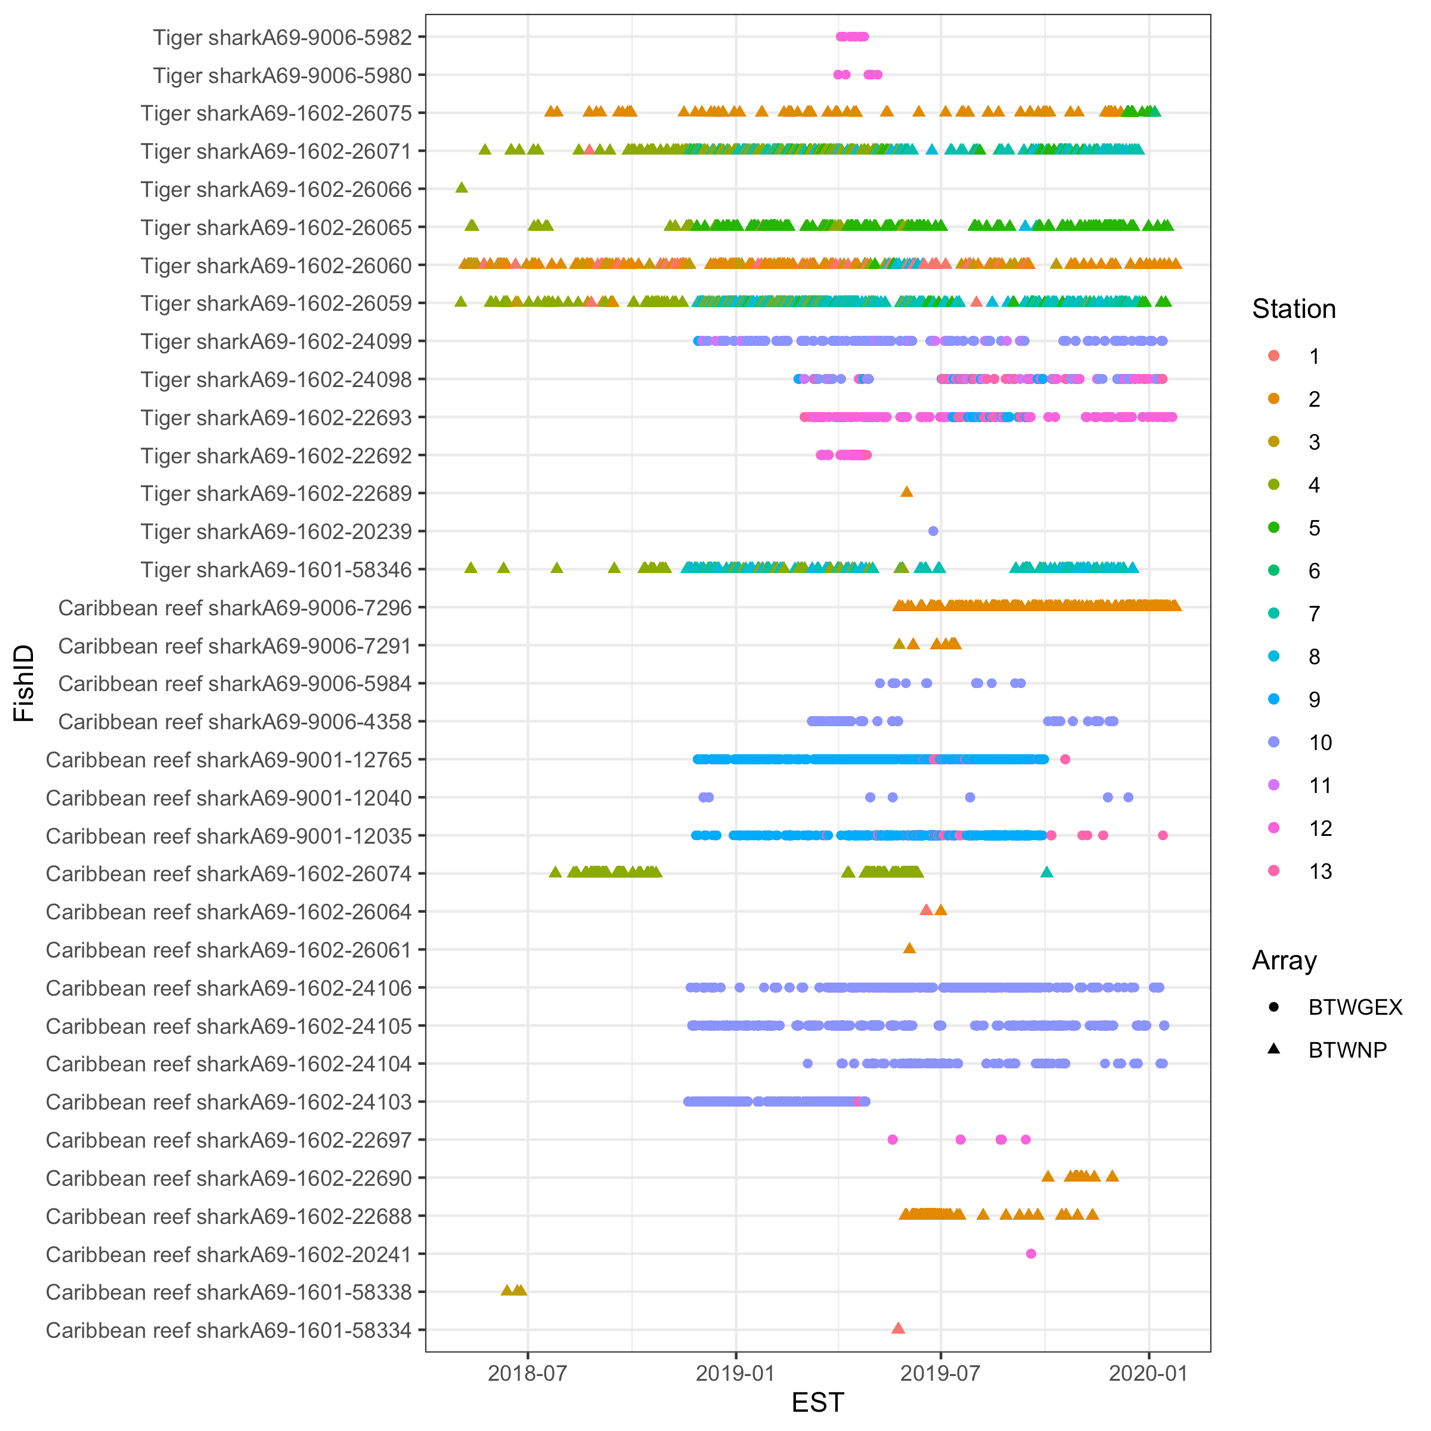

Supplement: Supplementary file 1 [file 26335357]
